# Supplementary material for: Effect of Functional Water on the Antioxidant Property of Concentrated Reconstituted Juice
Source: MDPI journal article supplement (doi:10.3390/foods11162531), 2022-08-21
Supplement: s1 [file s1]

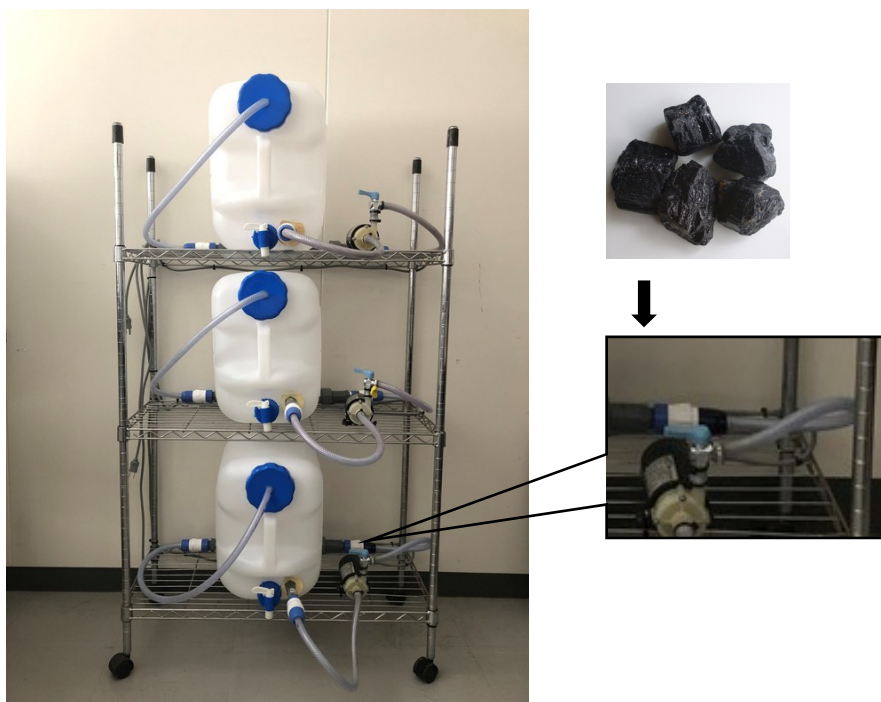

Figure S1 Tourmaline water (TMW) generator

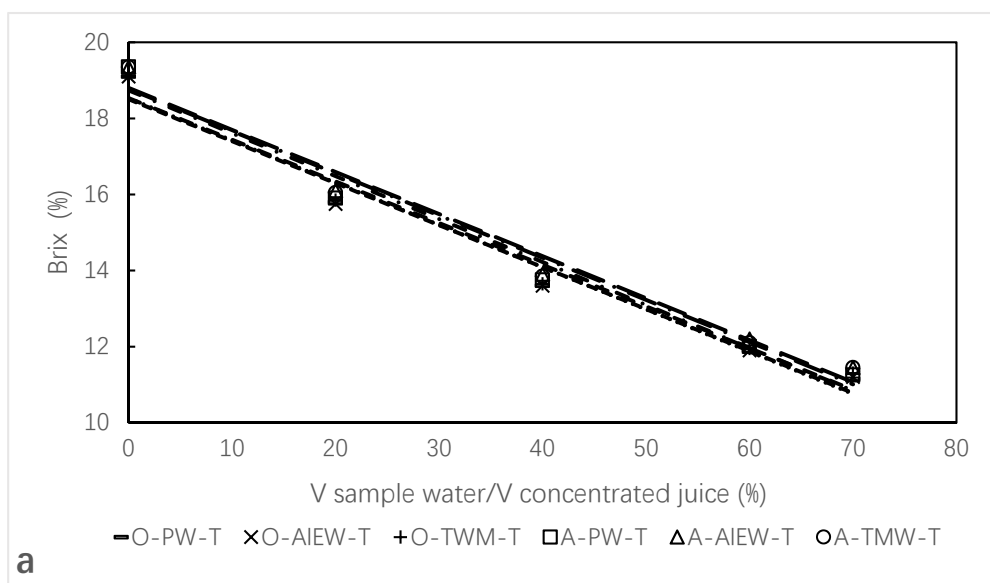

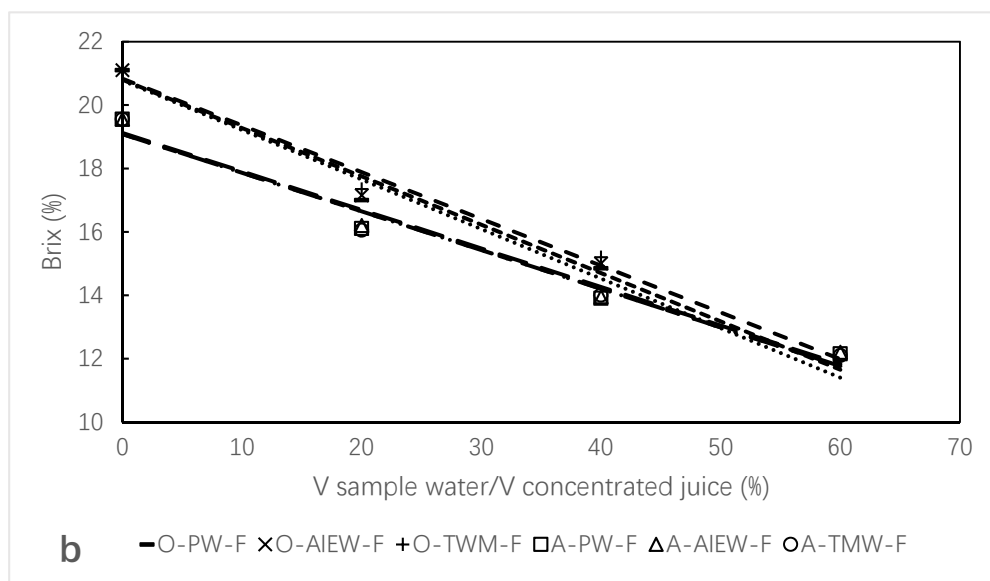

Figure S2 The relationship between volume of addition of sample water and the °Brix of the (a-tropicana, b-freshly squeezed) concentrated reconstituted juice.

a, O is orange; A is apple; T is tropicana juice; F is freshly squeezed juice; PW, AIEW and TMW refer to the concentrated reconstituted juice prepared by this kind of sample water.

Table S1 Sensory parameters scoring instructions <sup>a</sup>

| Score     | Color                                                               | odor                         | taste                                      |
|-----------|---------------------------------------------------------------------|------------------------------|--------------------------------------------|
| 3.0 – 4.0 | Typical fresh fruit color without browning and sedimentation        | Intense fruity odor          | Harmonious pleasant taste                  |
| 2.0 – 3.0 | Normal fresh fruit color with slight sedimentation without browning | Clearly fruity odor          | Fruity with moderate sweetness and acidity |
| 1.0 – 2.0 | Dark color with a little sedimentation and browning                 | Lightly fruity odor          | Fruity, discordant acidity and sweetness   |
| 0.0 – 1.0 | Abnormal color with obvious precipitation                           | No fruity or unpleasant odor | Pungent unpleasant taste                   |

<sup>a</sup> According to the IFU analysis method (No. 25, 2005) with some modifications.
